# Supplementary material for: Identification of Clinical and Socioeconomic Predictors of Adjuvant Therapy after Trans-Oral Robotic Surgery in Patients with Oropharyngeal Squamous Cell Carcinoma
Source: PubMed Central journal article supplement (PMC7565070; doi:10.3390/cancers12092474), 2020-09-01
Supplement: cancers-12-02474-s001.pdf [file cancers-12-02474-s001.pdf]

Article

# Identification of Clinical and Socioeconomic Predictors of Adjuvant Therapy After Trans-Oral Robotic Surgery in Patients with Oropharyngeal SCC

Sujith Baliga, Brett Klamer, Sachin Jhawar, Mauricio Gamez, Darrion Mitchell, Adriana Blakaj, John Grecula, Ulysses Gardner, Khlaed Dibs, Matthew Old, Nolan Seim, Stephen Kang, Ricardo Carrau, Amit Agrawal, Vidhya Karivedu, Priyanka Bhateja, Enver Ozer, James Rocco, Marcelo, Bonomi and Dukagjin Blakaj

SupplementaryMaterials:

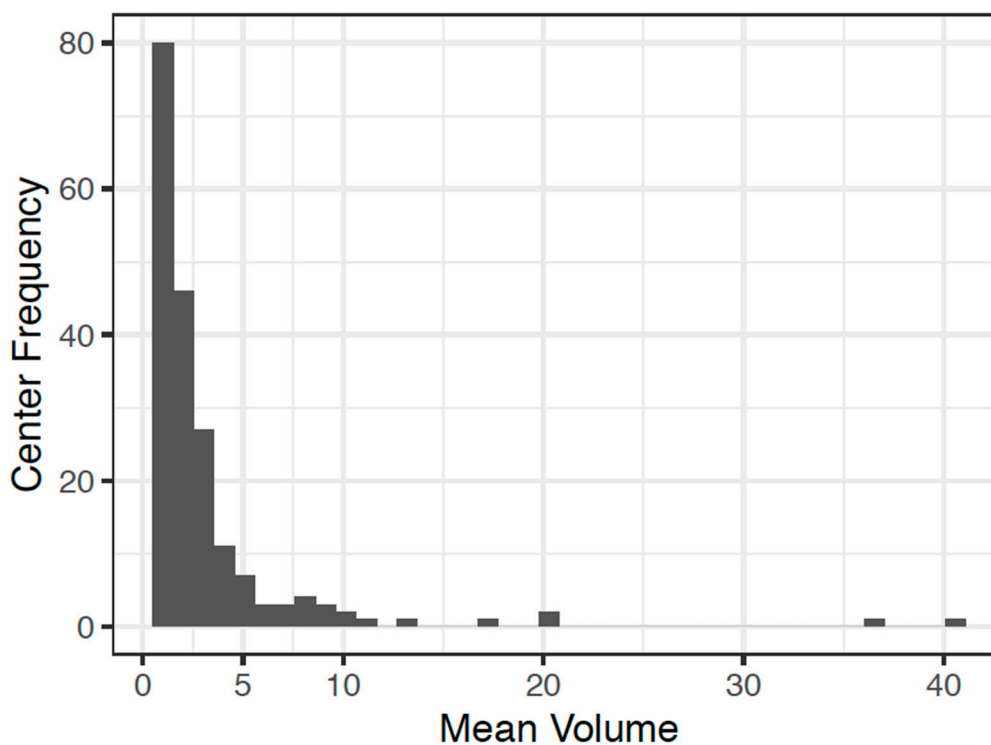

Figure S1. Relationship between mean center volume of TORS and center frequency.

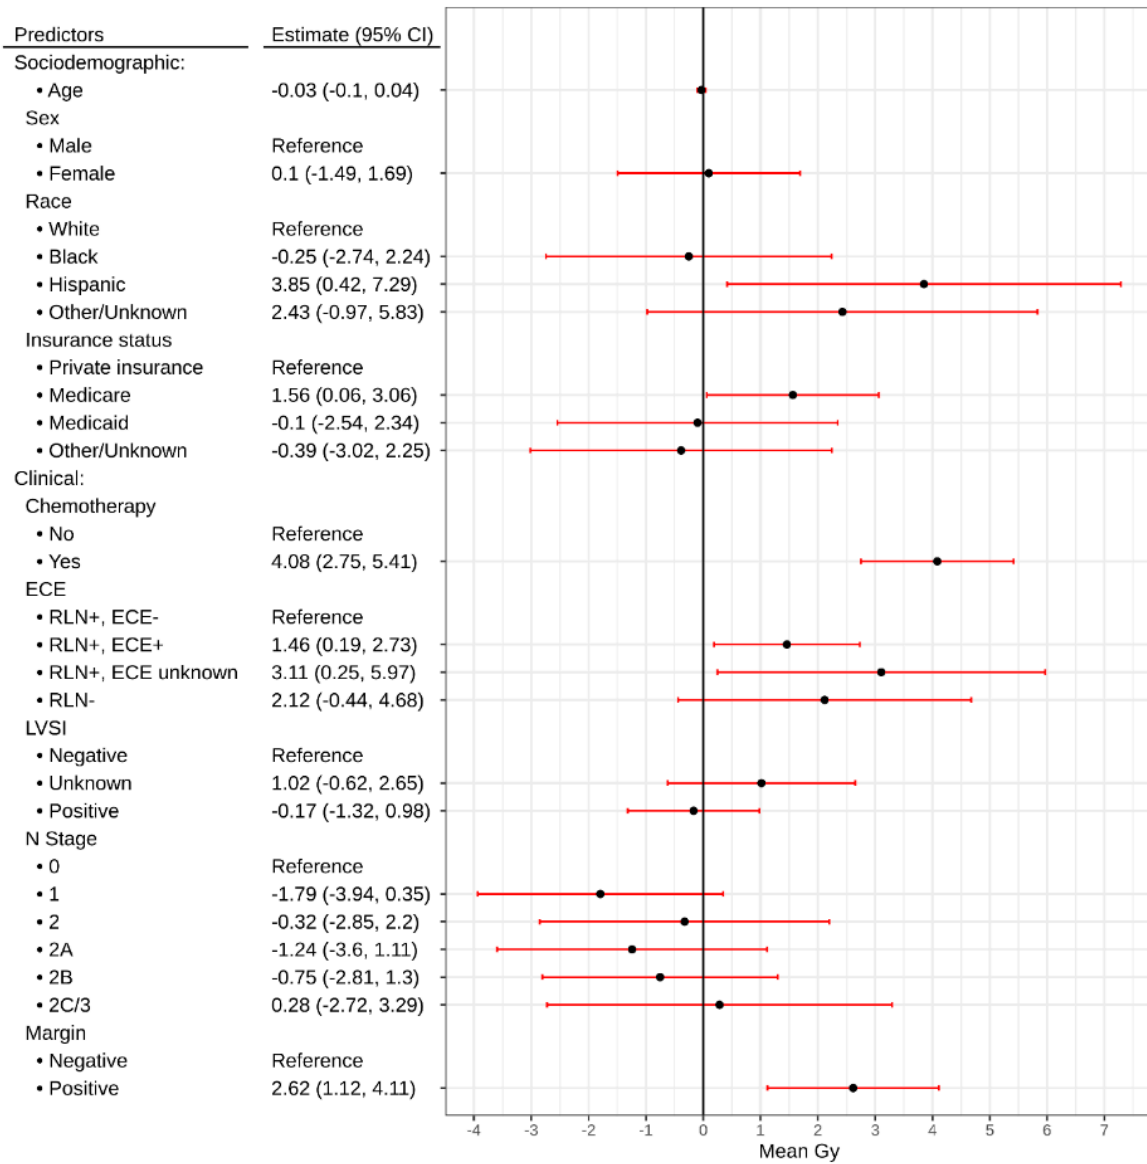

**Figure S2.** Forrest plot depicting mean change of estimated radiation dose among patients receiving doses of 50–70 Gy.
